# Supplementary material for: Flexible, Low-Cost Sensor Based on Electrolyte Gated Carbon Nanotube Field Effect Transistor for Organo-Phosphate Detection
Source: PubMed Central journal article supplement (PMC5470893; doi:10.3390/s17051147), 2017-05-18
Supplement: sensors-17-01147-s001.pdf [file sensors-17-01147-s001.pdf]

# Supplementary Materials: Flexible, Low-Cost Sensor Based on Electrolyte Gated Carbon Nanotube Field Effect Transistor for Organo-Phosphate Detection

Vijay Deep Bhatt, Saumya Joshi, Markus Becherer and Paolo Lugli

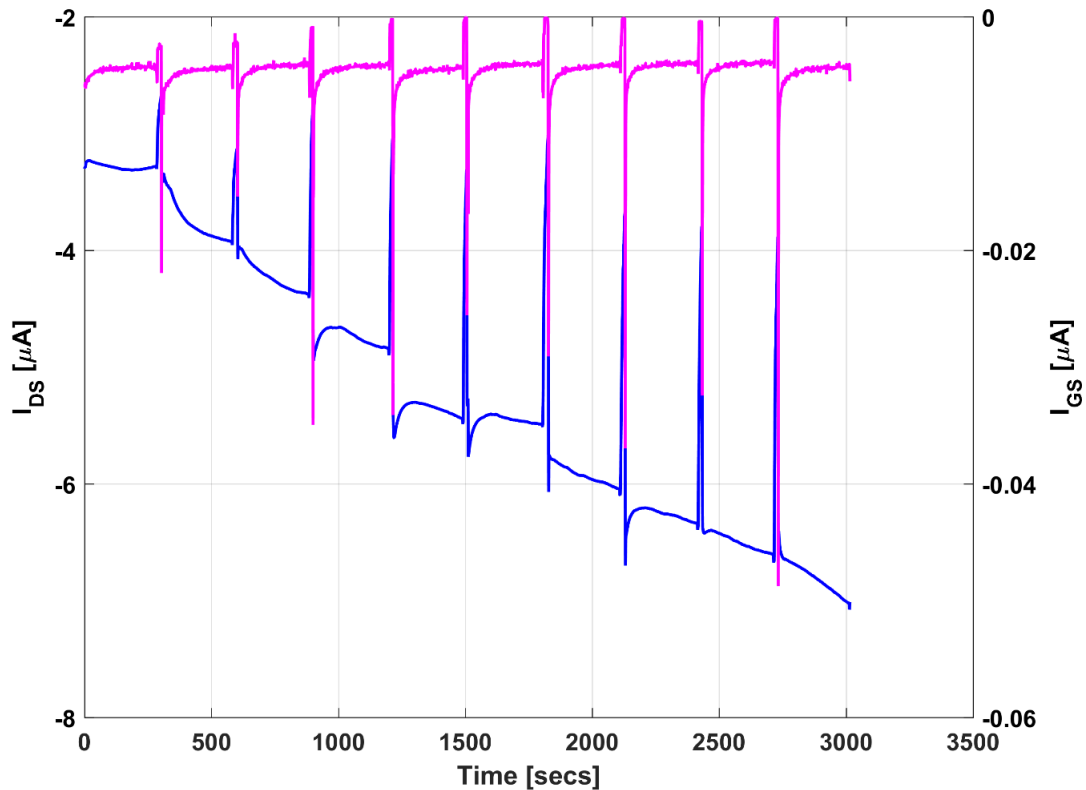

Figure S1. Impact of increasing acetylcholine concentration on the gate current.

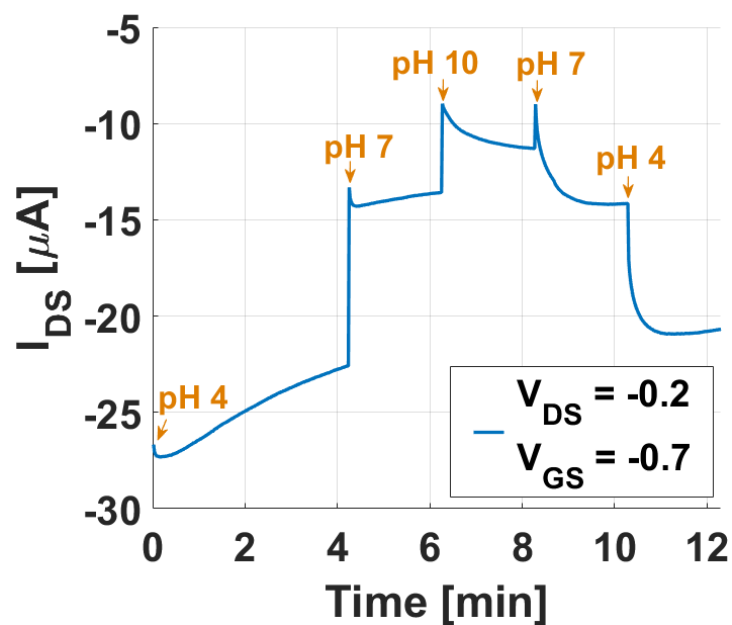

Figure S2. pH dependence of CNTFETs.

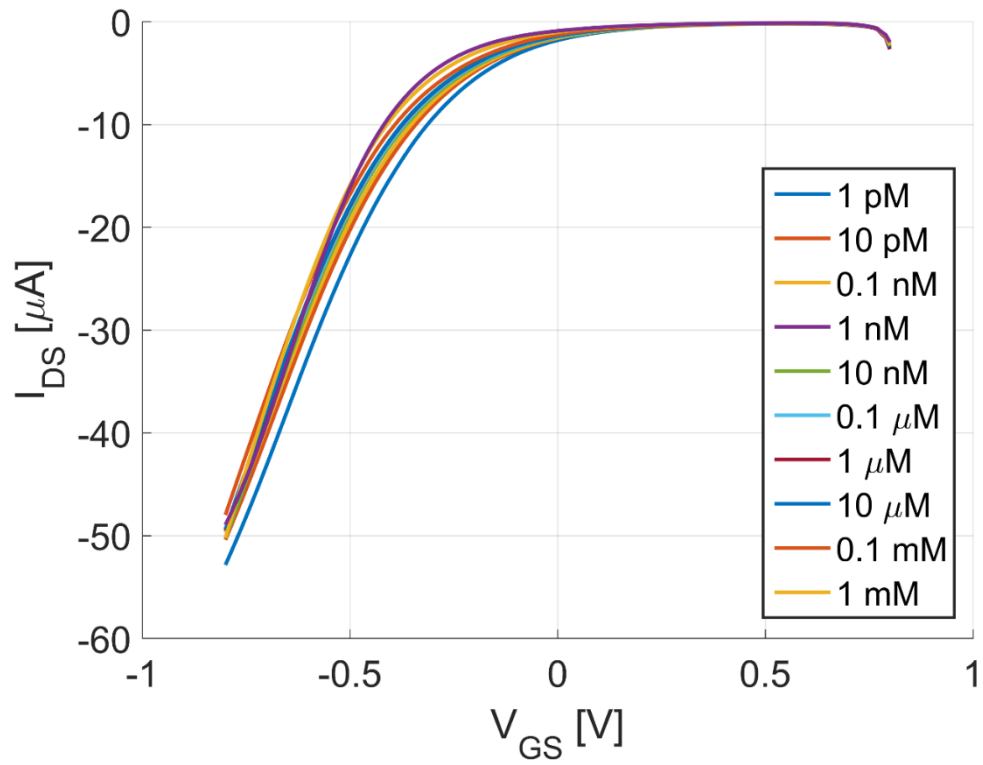

**Figure S3.** Control experiment1: Response of an un-functionalized device to varying concentrations of acetylcholine.

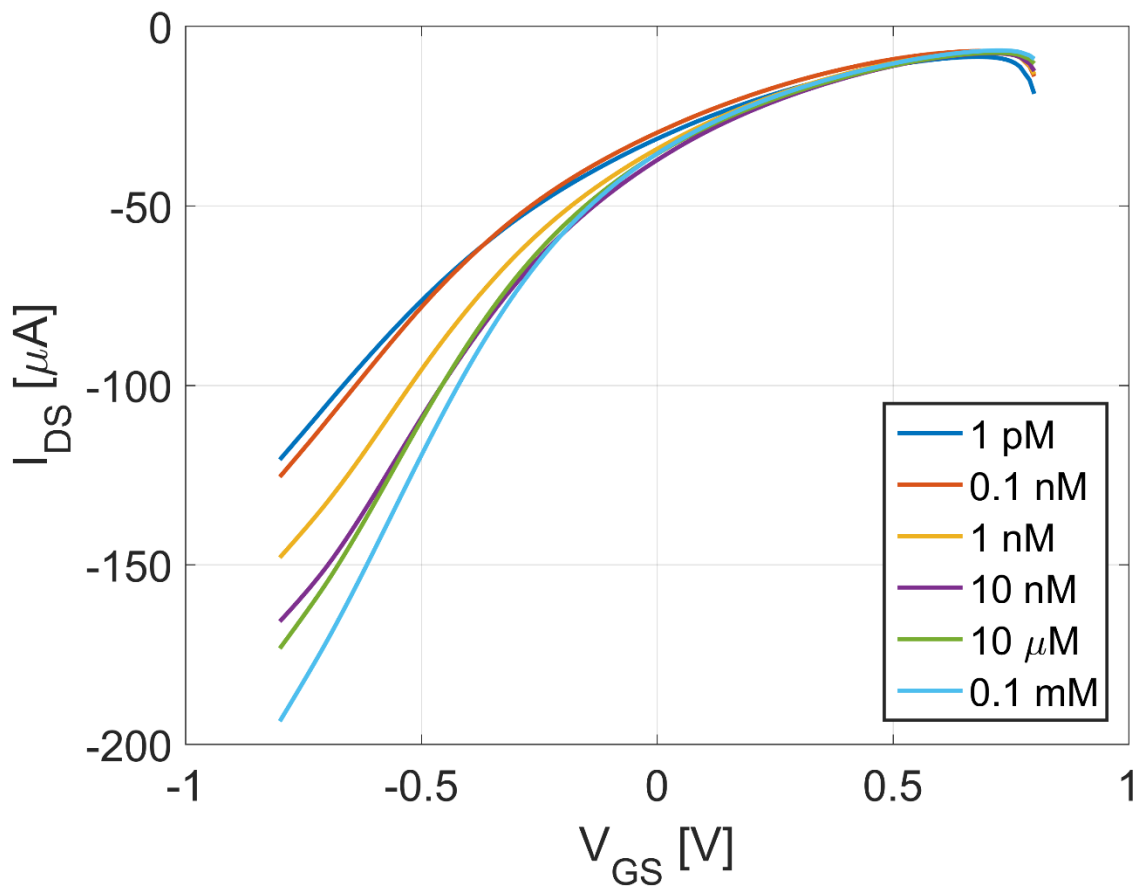

**Figure S4.** Control experiment2: Response of an un-functionalized device to varying concentrations of acetic acid.
